# Supplementary material for: Gallic Acid Suppressed Tumorigenesis by an LncRNA MALAT1-Wnt/β-Catenin Axis in Hepatocellular Carcinoma
Source: Front Pharmacol. 2021 Oct 6;12:708967. doi: 10.3389/fphar.2021.708967 (PMC8526893; doi:10.3389/fphar.2021.708967)
Supplement: Supplementary file 3 [file DataSheet3.xlsx]

## Sheet: Sheet1
Figure 1 A
		NC	50μM	100μM	150μM	200μM	400μM		NC	50μM	100μM	150μM	200μM	400μM		Figure 1B
HepG2	24h	1.302	1.196	1.143	0.385	0.14	0.111		99.9233	91.7882	87.7206	29.5472	10.7444	8.5188			HepG2				7402
		1.303	1.227	1.247	0.487	0.152	0.118		100	94.1673	95.7022	37.3753	11.6654	9.05602		NC	97	103	95		106	134	106
		1.304	1.239	1.259	0.515	0.158	0.126		100.077	95.0883	96.6232	39.5242	12.1259	9.66999		GA	73	60	63		64	60	55
	48h	1.93	1.915	1.497	0.322	0.137	0.105		98.3841	97.6194	76.3114	16.4143	6.98374	5.3525
		1.959	1.931	1.559	0.341	0.139	0.106		99.8624	98.435	79.4719	17.3829	7.08569	5.40348
		1.996	1.994	1.616	0.376	0.141	0.109		101.748	101.647	82.3775	19.167	7.18764	5.55641
	72h	2.781	2.534	2.046	0.255	0.108	0.102		99.1797	90.3709	72.9672	9.09415	3.85164	3.63766
		2.812	2.659	2.082	0.258	0.11	0.103		100.285	94.8288	74.2511	9.20114	3.92297	3.67332
		2.819	2.724	2.134	0.262	0.111	0.117		100.535	97.1469	76.1056	9.34379	3.95863	4.17261
Bel-7402	24h	0.812	0.817	0.721	0.463	0.133	0.097		95.2269	95.8133	84.5549	54.2981	15.5975	11.3756
		0.868	0.83	0.771	0.48	0.136	0.113		101.794	97.3379	90.4187	56.2918	15.9493	13.252
		0.878	0.836	0.787	0.507	0.144	0.133		102.967	98.0415	92.2951	59.4582	16.8875	15.5975
	48h	0.871	0.837	0.771	0.276	0.084	0.086		98.5294	94.6833	87.2172	31.2217	9.50226	9.72851
		0.884	0.864	0.799	0.295	0.098	0.087		100	97.7376	90.3846	33.371	11.086	9.84163
		0.897	0.879	0.821	0.31	0.1	0.094		101.471	99.4344	92.8733	35.0679	11.3122	10.6335
	72h	0.98	0.987	0.901	0.202	0.084	0.079		96.7423	97.4334	88.9437	19.9408	8.2922	7.79862
		1.009	1.001	0.935	0.204	0.084	0.081		99.6051	98.8154	92.3001	20.1382	8.2922	7.99605
		1.05	1.013	0.949	0.212	0.086	0.092		103.653	100	93.6821	20.9279	8.48963	9.08193
LO2	24h	1.741	1.722	1.721	1.656	1.73	1.454		97.6264	96.5609	96.5049	92.86	97.0095	81.5329
		1.78	1.733	1.732	1.658	1.759	1.49		99.8133	97.1778	97.1217	92.9721	98.6357	83.5516
		1.829	1.756	1.765	1.669	1.762	1.526		102.561	98.4675	98.9721	93.589	98.8039	85.5703
	48h	1.537	1.395	1.315	1.274	1.314	0.542		99.3343	90.157	84.9868	82.337	84.9221	35.0288
		1.547	1.447	1.385	1.319	1.325	0.625		99.9806	93.5177	89.5108	85.2453	85.633	40.3929
		1.558	1.456	1.41	1.324	1.36	0.65		100.692	94.0994	91.1265	85.5684	87.895	42.0087
	72h	1.571	1.564	1.483	1.424	1.426	0.208		97.6383	97.2032	92.169	88.5022	88.6265	12.9273
		1.624	1.573	1.485	1.465	1.439	0.303		100.932	97.7626	92.2933	91.0503	89.4344	18.8316
		1.633	1.598	1.517	1.481	1.444	0.308		101.492	99.3163	94.2822	92.0447	89.7452	19.1423
	Figure 2B								Figure 2D
		HepG2							Bel-7402
		NC			GA				NC			GA
	G0/G1	63.61	62.23	62.41	45.1	45.62	52.3		65.21	66.96	67.84	72.22	70.16	71.34
	S	27.94	31.51	33.2	30.89	27.56	32.95		26.21	24.11	23.78	20.62	21.61	20.34
	G2/M	8.45	6.26	4.39	24.01	26.82	14.76		8.58	8.93	8.38	7.16	8.23	8.32
		Figure 2E							Figure 2F
		NC			GA				NC			GA
		7.78	10.4	8.97	78.78	66.99	80.97		5.92	10.16	10.27	24.7	25.42	39.44
Figure 2G
HepG2		GAPDH			Bax			Bcl-2			Bcl-xl
	NC	16.27	16.32	16.34	28.95	28.85	28.91	27.94	27.9	27.95	27.91	27.88	27.88
	GA	16.88	16.88	16.76	29.09	29.13	29.14	29.2	29.4	29.33	28.69	28.66	28.62
			2–ΔΔCt	NC	0.968148	1.03764	0.995367	0.993092	1.02101	0.986233	0.986233	1.00696	1.00696
				GA	1.26866	1.23396	1.22544	0.598739	0.521233	0.547147	0.82932	0.846745	0.870551
Figure 2H
		GAPDH			Bax			Bcl-2			Bcl-xl
Bel-7402	NC	16.7	16.71	16.73	31.63	31.77	31.71	26.11	26.22	26.12	26.59	26.53	26.55
	GA	15.93	15.97	15.94	30.4	30.33	30.31	26.13	26.14	26.15	26.56	26.47	26.47
			2–ΔΔCt	NC	1.05212	0.95482	0.995367	1.02811	0.952638	1.02101	0.977162	1.01866	1.00463
				GA	1.45065	1.52277	1.54403	0.596007	0.59189	0.587801	0.586446	0.624196	0.624196
	Figure 3A			Figure 3B			Figure 3C			Figure 3D
	HepG2			Bel-7402			HepG2			Bel-7402
	NC	GA		NC	GA		NC	GA		NC	GA
	44.4162	23.8605		23.298	8.20265		420	307		457	270
	50.5848	29.0354		23.7855	12.1519		444	312		447	246
	53.4491	29.863		26.4916	11.41		450	328		439	302
	Figure 3E							Figure 3F						Figure 3G							Figure 3H
		GAPDH	E-cad	Vimentin	N-cad	FN		ZEB1	ZEB2	snail-1	snail-2	twist			GAPDH	E-cad	Vimentin	N-cad	FN		ZEB1	ZEB2	snail-1	snail-2	twist
	NC	14.45	34.06	19.31	21.77	24.74		25.84	27.04	26.05	23.68	26.61		NC	15.55	34.25	19.21	21.62	24.17		25.74	27.18	25.85	25.54	27.97
		14.45	34.08	19.31	21.74	24.71		25.81	27.02	26	23.68	26.61			15.6	34.25	19.22	21.64	24.19		25.74	27.23	25.82	25.54	27.95
		14.47	34.12	19.22	21.74	24.76		25.74	26.98	25.91	23.7	26.7			15.62	34.11	19.21	21.61	24.25		25.76	27.47	25.86	25.64	27.95
	GA	14.72	33.65	19.95	22.55	25.28		26.81	28.25	26.83	24.54	27.2		GA	15.26	33.71	19.32	21.51	24.56		25.63	27.46	26.04	25.87	28.01
		14.87	33.68	20.13	22.65	25.36		26.88	28.35	26.89	24.46	27.25			15.47	33.71	19.28	21.59	24.66		25.68	27.53	26.07	26.04	27.93
		14.85	33.72	19.89	22.59	25.51		26.73	28.41	26.93	24.49	27.28			15.28	33.72	19.32	21.54	24.56		25.69	27.49	26.05	26.01	27.96
	2–ΔΔCt	NC	1.01866	0.97942	0.986233	0.997694		0.970412	0.981684	0.957053	1.00463	1.02101		2–ΔΔCt	NC	0.968168	1.00231	1.00231	1.02337		1.00463	1.08172	0.995387	1.02337	0.990803
			1.00463	0.97942	1.00696	1.01866		0.990803	0.995387	0.990803	1.00463	1.02101				0.968168	0.995387	0.988512	1.00928		1.00463	1.04487	1.0163	1.02337	1.00463
			0.977162	1.04247	1.00696	0.983959		1.04006	1.02337	1.05458	0.990801	0.959264				1.06683	1.00231	1.00928	0.968168		0.990803	0.884743	0.988512	0.954839	1.00463
		GA	1.73303	0.80476	0.735415	0.878613		0.634328	0.543352	0.713656	0.708725	0.868519			GA	1.18099	0.779165	0.907519	0.655197		0.909623	0.747425	0.732043	0.68302	0.808511
			1.69737	0.710364	0.686166	0.831219		0.604285	0.506966	0.684584	0.749135	0.838934				1.18099	0.80107	0.858565	0.61132		0.878638	0.712025	0.716978	0.607097	0.854611
			1.65095	0.838934	0.715305	0.749136		0.670496	0.486314	0.665864	0.733718	0.821669				1.17283	0.779165	0.888843	0.655197		0.872568	0.732043	0.726986	0.619854	0.837023
		Figure 4A								Figure 4B						Figure 4C							Figure 4D
			NC			GA						GAPDH	β-catenin	2–ΔΔCt			GAPDH	VEGF	Oct3/4	survivin	CCND1			GAPDH	VEGF	Oct3/4	survivin	CCND1
		HepG2	TOP	RL-TK	RLU	TOP	RL-TK	RLU		HepG2	NC	15.44	26.04	1.0473		NC	15.74	24.09	27.17	26.27	22.92		NC	16.88	25.01	29.7	26.31	23.61
			1756	3372	1.04794	907	3262	0.559532				15.51	26.23	0.918066			15.79	24.05	27.15	26.32	23.03			16.91	24.99	29.77	26.51	23.53
			1773	3162	1.12836	850	4391	0.389544				15.52	26.05	1.04006			15.75	24.06	27.15	26.28	23.01			16.89	25	29.78	26.5	23.58
			1691	3405	0.999373	849	3707	0.460878			GA	15.47	26.49	0.747425		GA	15.66	24.16	27.78	26.41	23.31		GA	16.13	24.81	29.55	25.96	23.69
												15.44	26.39	0.80107			15.65	24.11	27.94	26.38	23.27			16.21	24.77	29.51	26.03	23.45
		Bel-7402	159	812.5	0.983458	71	696.3	0.512441				15.45	26.36	0.817902			15.65	24.15	27.99	26.39	23.16			16.14	24.82	29.52	25.95	23.49
			147	730.2	1.01171	44	708.6	0.312057		Bel-7402	NC	16.7	27.99	1.01162
			147	735.2	1.00483	64	749.5	0.429131				16.71	28.06	0.963709		2–ΔΔCt	NC	0.983957	0.990803	1.01396	1.04729		2–ΔΔCt	NC	0.993092	1.03526	1.09429	0.974905
												16.7	27.97	1.02574				1.01162	1.00463	0.97942	0.97041				1.00696	0.986231	0.952638	1.03049
											GA	15.93	28.66	0.376314				1.00463	1.00463	1.00696	0.983957				1	0.979418	0.959264	0.995389
												15.97	28.69	0.36857			GA	0.870549	0.602904	0.854605	0.74226			GA	0.686185	0.690957	0.838958	0.554786
												15.94	28.99	0.299372				0.901249	0.539614	0.872562	0.763128				0.705477	0.710382	0.799223	0.655198
	Figure 4G																	0.876604	0.521233	0.866535	0.823589				0.681445	0.705475	0.844793	0.637282
		NC	GA	LiCl	LiCl+GA			Figure 4H
	OD	1.089	0.578	1.45	0.916			NC	GA	LiCl	LiCl+GA
		1.051	0.576	1.412	1.009			140	48	194	85
		1.032	0.548	1.184	0.902			155	40	187	101			Figure 4J
								133	27	189	100				HepG2-NC			HepG2-GA			7402-NC			7402-GA
	Relative cell viability	101.264	86.3226	109.161	98.7097									GAPDH	13.66	13.57	13.61	14.01	13.94	14.1	14.73	14.73	14.81	14.67	14.57	14.73
		100.955	84.8516	108.542	95.2258									HOTTIP	25.71	25.76	25.72	25.93	25.9	25.89	28	27.9	27.96	28.25	28.16	28.26
		97.7806	84.3097	101.652	88.258									H19	17.06	17.1	16.99	17.35	17.53	17.41	24.13	24.09	24.2	24.21	24.24	24.25
														TINCR	20	19.95	20.06	20.32	20.44	20.44	21.97	21.94	21.96	22.29	22.29	22.45
														HULC	29.11	29.24	29.01	29.56	29.55	29.51	30.12	30.24	30.21	30.88	30.95	30.93
														MALAT1	20.18	20.02	20.01	21.17	21.24	21.19	20.23	20.11	20.08	20.52	20.48	20.61
														ROR	19.5	19.46	19.48	19.63	19.69	19.73	18.08	18.25	18.26	17.99	18.04	18.19
														2–ΔΔCt
														HOTTIP	1.01396	0.97942	1.00696	1.15136	1.17555	1.18373	0.968168	1.03766	0.995387	0.75961	0.808506	0.754363
														H19	0.993092	0.965936	1.04247	1.07426	0.94825	1.0305	1.00696	1.03526	0.959264	0.888843	0.870551	0.864537
														TINCR	1.00231	1.03766	0.961483	1.06192	0.977164	0.977164	0.990801	1.01162	0.997692	0.740549	0.740549	0.66281
														HULC	1.00696	0.920188	1.07923	0.974909	0.98169	1.00929	1.17827	1.08423	1.10701	0.649171	0.618425	0.61132
														MALAT1	0.926588	1.03526	1.04247	0.616999	0.587777	0.608505	0.939523	1.02101	1.04247	0.716978	0.737135	0.673617
														ROR	0.986233	1.01396	1	1.19196	1.14341	1.11214	1.08423	0.963707	0.957051	1.07674	1.04006	0.937355
			Figure 5A					Figure 5B
				GAPDH	MALAT1	2–ΔΔCt				V-NC	V-GA	MALAT1-NC	MALAT1-GA		V-NC	V-GA	MALAT1-NC	MALAT1-GA
			Vector	14.52	19.26	1.07923		24h	OD	1.308	1.115	1.41	1.275	Relative cell viability	101.264	86.3226	109.161	98.7097
				14.51	19.21	1.11728				1.304	1.096	1.402	1.23		100.955	84.8516	108.542	95.2258
				14.49	19.24	1.09429				1.263	1.089	1.313	1.14		97.7806	84.3097	101.652	88.258
			P-MALAT1	15.89	18.12	6.24772
				15.93	18.18	5.99321		48h		1.211	0.738	1.396	0.857		99.7685	60.8003	115.01	70.6041
				15.88	18.15	6.11914				1.263	0.728	1.439	0.912		104.053	59.9764	118.552	75.1353
										1.165	0.748	1.357	0.925		95.9788	61.6241	111.797	76.2063
								72h		1.774	0.58	1.916	0.669		102.94	33.6558	111.18	38.8202
										1.702	0.562	1.867	0.659		98.7623	32.6113	108.337	38.2399
										1.694	0.536	1.856	0.625		98.2981	31.1026	107.698	36.267
				Figure 5C
				V-NC	V-GA	MALAT1-NC	MALAT1-GA
				28	18	73	28		Figure 5F						Figure 5G
				25	18	69	29			V-NC	V-GA	MALAT1-NC	MALAT1-GA			V-NC			V-GA			MALAT1-NC			MALAT1-GA
				35	20	69	31		TOP	270	1095	420	0		VEGF	22.5579	22.7888	22.8152	22.7878	22.8661	22.8459	21.901	22.0742	22.0914	22.4275	22.4517	22.43
										270	1035	435	0		oct3/4	24.9184	24.9769	24.9109	25.176	25.0432	25.1519	24.0122	23.8945	23.8995	24.6796	24.6324	24.6189
				Figure 5D						300	1035	465	0		survivin	19.5446	19.2817	19.5006	19.5331	19.3957	19.4901	18.836	18.754	18.5913	18.7692	18.7768	18.7345
				V-NC	V-GA	MALAT1-NC	MALAT1-GA								CCND1	21.3968	21.343	21.3067	21.7014	21.806	21.8012	20.7651	20.8503	20.7975	21.1601	21.1816	21.3812
				345	195	723	262		RL-TK	70264	133975	7836	3867			2–ΔΔCt
				359	155	752	245			64083	116764	5523	3282		VEGF	1.11939	0.953829	0.936591	0.717435	0.679542	0.689133	1.31252	1.16402	1.15021	0.838518	0.824557	0.837064
				375	164	680	309			64077	116854	5531	3586		oct3/4	1.03553	0.994358	1.04087	0.651036	0.713802	0.662005	1.44306	1.56581	1.56036	0.83615	0.863992	0.872121
															survivin	0.93153	1.11776	0.960407	0.705762	0.776286	0.727095	1.13206	1.19821	1.34128	1.09114	1.0854	1.11768
				Figure 5E					RLU	0.989003	0.770479	4.90765	4.36173		CCND1	0.967298	1.00403	1.02966	0.588673	0.547484	0.549328	1.11448	1.05055	1.08978	0.77998	0.768435	0.66915
				V-NC	V-GA	MALAT1-NC	MALAT1-GA			1.00017	0.652924	5.61922	4.31692
				532	60	618	115			1.01079	0.69861	5.85505	4.51538
				530	70	666	124
				504	68	648	132
										Figure 6D
											Control1			GA( i.g.)			Control 2			GA(i.p.)
				Figure 6C						0	0	0	0	0	0	0	0	0	0	0	0	0
				Control1	GA( i.g.)	Control 2	GA(i.p.)			1	11.5044	6.31109	11.8796	4.22823	3.05648	2.40411	3.93838	1.66064	1.08784	4.51622	1.26493	1.06466
				0.49	0.36	0.52	0.37			2	19.6767	16.2067	16.1075	5.98121	6.93345	3.43893	8.41618	12.7017	7.62667	6.96285	8.18183	4.81419
				0.44	0.27	0.55	0.45			3	22.4246	16.2875	30.6616	11.6722	8.78384	3.73176	14.8048	22.7803	22.1067	9.75665	9.83508	8.15888
				0.33	0.39	0.47	0.42			4	29.3469	21.8653	36.765	12.0562	9.55244	4.50331	23.6544	35.2856	30.6691	11.8965	12.0377	8.26747
				Figure 7B					Figure 7D
				Control1	GA( i.g.)	Control 2	GA(i.p.)		E-cadherin					Vimentin					MM9
				180	1022	142	498		Control1	GA( i.g.)	Control 2	GA(i.p.)		Control1	GA( i.g.)	Control 2	GA(i.p.)		Control1	GA( i.g.)	Control 2	GA(i.p.)
				176	988	152	566		17.287	30.525	5.418	60.578		61.052	50.198	57.908	32.264		59.684	22.622	46.702	2.286
				156	897	149	485		15.3	33	6	60		61	45	59	31		58	20	50	6
									12.4	29	5.6	61		62	48	58	29		59	18	51	8
